# Supplementary material for: Bacterial Outer Membrane Vesicles Loaded with Perhexiline Suppress Tumor Development by Regulating Tumor-Associated Macrophages Repolarization in a Synergistic Way
Source: MDPI journal article supplement (doi:10.3390/ijms241311222), 2023-07-07
Supplement: s1 [file s1]

## ***Supplementary Materials***

**of**

### **Bacterial Outer Membrane Vesicles Loaded with Perhexiline Suppress Tumor Development by Regulating Tumor-associated Macrophages Repolarization in a Synergistic Way**

Shoujin Jiang<sup>1</sup>, Wei Fu<sup>1</sup>, Sijia Wang<sup>1</sup>, Guanshu Zhu<sup>1</sup>, Jufang Wang<sup>1,2</sup>, Yi Ma<sup>1,2\*</sup>

**\* Correspondence:**

Corresponding Author: bimayikobe@scut.edu.cn

**Supplementary Figures and Tables**

**Supplementary Table S1.** Fluorescence quantitative PCR primer sequence

| Primer         | Sequence (5'-3')         |
|----------------|--------------------------|
| $\beta$ -actin | F: CACTGTCGAGTCGCGTCC    |
|                | R: CGCAGCGATATCGTCATCCA  |
| Arg-1          | F: ACATTGGCTTGCGAGACGTA  |
|                | R: ATCACCTTGCCAATCCCCAG  |
| CD206          | F: GTGGGGACCTGGCAAGTATC  |
|                | R: CACTGGGGTTCCATCACTCC  |
| IL-6           | F: CCCCAATTTCGAATGCTCTCC |
|                | R: CGCACTAGGTTTGCCGAGTA  |
| TNF- $\alpha$  | F: TAGCCACGTCGTAGCAAAC   |
|                | R: ACAAGGTACAACCCATCGGC  |

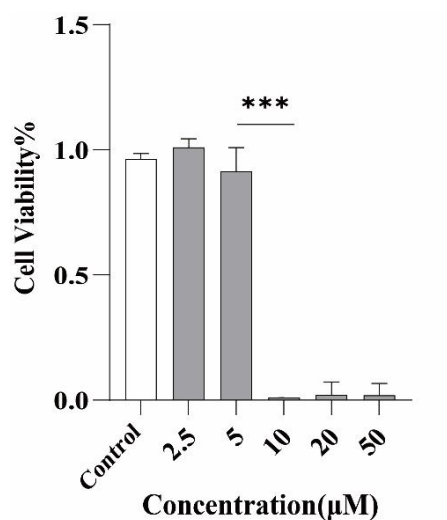

**Supplementary Figure S1.** The cytotoxicity of perhexiline to RAW264.7 was monitored by CCK-8 (n=6). Data were presented as the mean±SD (one-way ANOVA comparison tests, \*\*\* $P<0.001$ ).

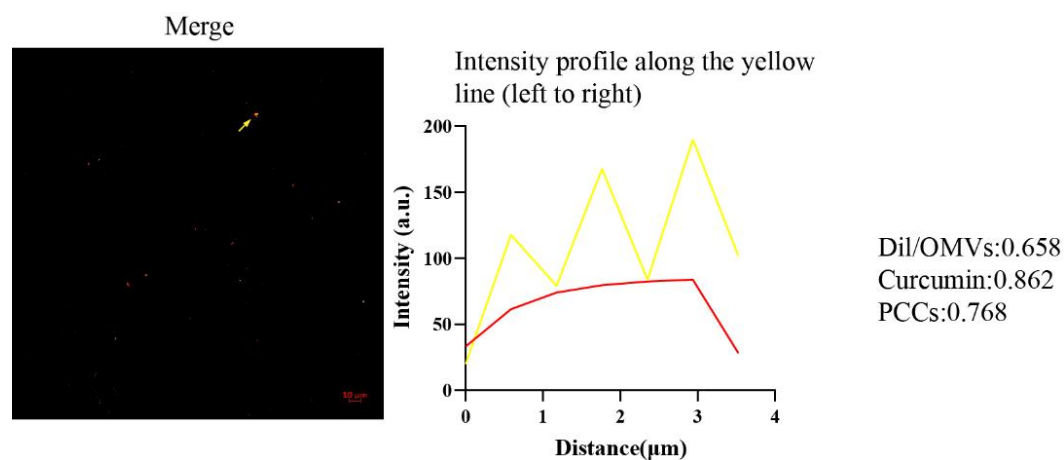

**Supplementary Figure S2.** Colocalization of Dil-Cur in OMVs. OMVs were treated with Dil and Curcumin, and imaged by CLSM. Pearson's correlation coefficients for Dil and Cur are 0.658 and 0.682, respectively. Excitation wavelength for Dil and Cur are 610 and 517 nm, respectively. Scale bar, 10 μm.

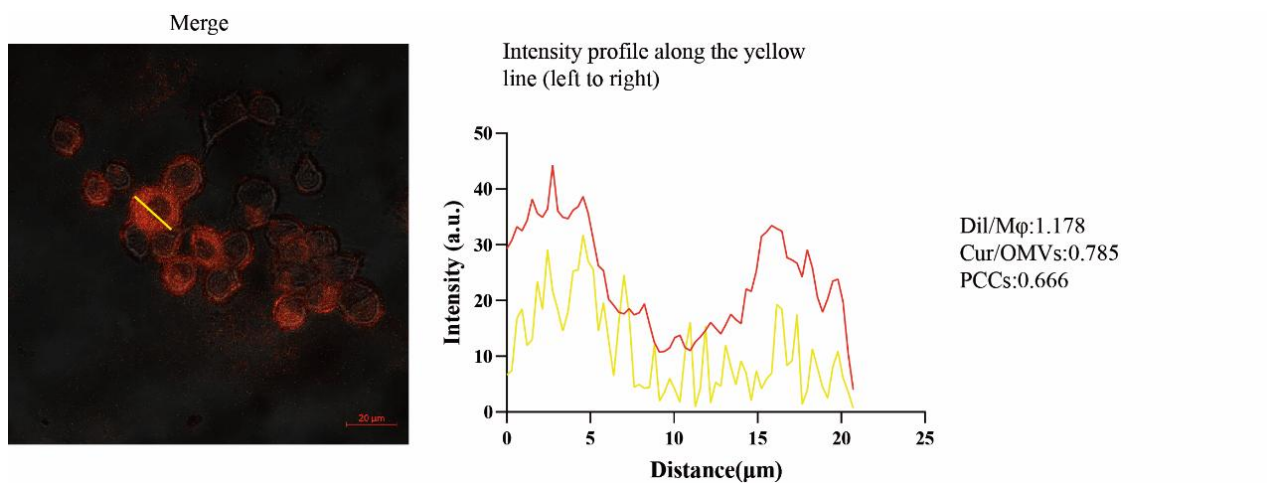

**Supplementary Figure S3.** Colocalization of Dil-Cur in macrophages. OMVs were treated with Curcumin, and macrophages were treated with Dil. Pearson's correlation coefficients for Dil and Cur are 1.178 and 0.785, respectively. Excitation wavelength for Dil and Cur are 610 and 517 nm, respectively. Scale bar, 20  $\mu\text{m}$ .
